# Supplementary material for: Bimetallic layered-double hydroxides anchored on reduced graphene oxide as a bifunctional electrocatalyst for electrochemical water splitting
Source: Royal Society of Chemistry journal article supplement (doi:10.1039/d5ra04536c), 2025-01-01
Supplement: d5ra04536c1.pdf [file d5ra04536c1.pdf]

## **Supporting Information**

# **Bimetallic Layered-Double Hydroxides Anchored on Reduced Graphene Oxide as a Bifunctional Electrocatalyst for Electrochemical Water Splitting**

Asad Ullah Khan<sup>1</sup>, Syed Haider Ali Shah<sup>1</sup>, Fariah Salam<sup>2</sup>, Afzal Shah\*<sup>1</sup>, Faiza Jan Iftikhar<sup>3</sup>,  
Muhammad Umar Farooq<sup>4</sup>, Muhammad Abdullah Khan<sup>2</sup>

<sup>1</sup>Department of Chemistry, Quaid-i-Azam University, Islamabad 45320, Pakistan

<sup>2</sup>Renewable Energy Advancement Laboratory, Department of Environmental Sciences, Quaid-i-Azam University, Islamabad 45320, Pakistan

<sup>3</sup>NUTECH School of Applied Science & Humanities, National University of Technology, Islamabad 44000, Pakistan

<sup>4</sup>National Center for Physics, Islamabad, 45320, Pakistan

Correspondence\*: afzals\_qau@yahoo.com

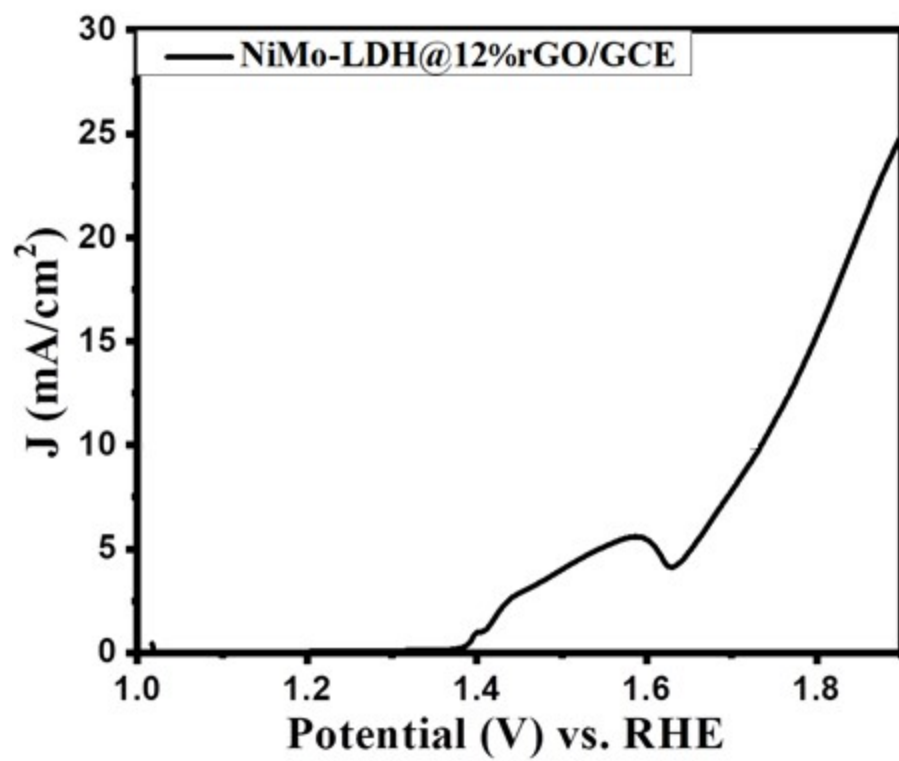

**Figure S1.** LSV polarization curve of NiMo-LDH@12%rGO
